# Supplementary material
Source: MDPI journal article supplement (https://www.mdpi.com/2075-163X/13/1/44)
Supplement: s1 [file s1]

# Supplementary Information

Manuscript ID: minerals-2029538

Type of manuscript: Article

Title: Resource intensity trends in the South African ferrochrome industry  
from 2007 to 2020

Authors: Reuben Dlamini, Harro Von Blottnitz

This supplementary document is in support of the article under review with the details stated above.

Table S1: Summary of similar previous studies reviewed to guide this study.

| Study                                                                                                                                                                               | Scope                                                                                                                                            | Methodology                                                                                                                                                                                                                                                                                                                                             | Conclusions                                                                                                                                                                                                                                                                                                                                                                                                                                                   |
|-------------------------------------------------------------------------------------------------------------------------------------------------------------------------------------|--------------------------------------------------------------------------------------------------------------------------------------------------|---------------------------------------------------------------------------------------------------------------------------------------------------------------------------------------------------------------------------------------------------------------------------------------------------------------------------------------------------------|---------------------------------------------------------------------------------------------------------------------------------------------------------------------------------------------------------------------------------------------------------------------------------------------------------------------------------------------------------------------------------------------------------------------------------------------------------------|
| <b>Mudd, 2007 [7]</b> <ul style="list-style-type: none"> <li>Investigated resource intensity trends of gold mining amidst environmental concerns and changing ore grades</li> </ul> | <b>Gold</b><br>Africa, Australia, North America & Asia-Pacific                                                                                   | <ul style="list-style-type: none"> <li>Investigated ore grade, gold production, waste volumes, greenhouse gas emissions (GGEs), energy use, water use, cyanide use, available economic resources, etc.</li> <li>Data (assumed high quality) from companies, governments and other mining periodical</li> </ul>                                          | <ul style="list-style-type: none"> <li>Ore grade was decreasing over time</li> <li>Cyanide, water, energy use and GGEs increased with decreasing ore grade</li> <li>A resurgence in production volumes because of advancing technology (modern earth moving equipment, development of carbon-in-pulp (CIP) milling technology)</li> <li>Results varied with operation conditions</li> </ul>                                                                   |
| <b>Gediga &amp; Russ, 2007 [15]</b> <ul style="list-style-type: none"> <li>Ferrochrome LCA study by ICDA to update previous for benchmarking</li> </ul>                             | <b>Ferrochrome (FeCr)</b><br>7 ICDA FeCr producers<br>62.1% FeCr global production<br>Years 2003 to 2005<br>Finland, Kazakhstan and South Africa | <ul style="list-style-type: none"> <li>LCA approach</li> <li>Data collection from participating companies (material flows and energy consumption)</li> <li>Horizontal averages were taken for each unit process types</li> <li>The distinction on was made between with process unit averages</li> <li>Furnace technology was differentiated</li> </ul> | <ul style="list-style-type: none"> <li>The industry was more energy efficient in comparison to the 1999 study.</li> <li>Closed furnaces with preheating were found to be most energy followed by closed furnaces without preheating and open arc furnaces.</li> <li>The industry was predicted to be more energy efficient with more closed furnaces being used in the industry</li> <li>The same trend was observed with CO<sub>2</sub> emissions</li> </ul> |
| <b>Glaister &amp; Mudd, 2010 [10]</b> <ul style="list-style-type: none"> <li>To evaluate the environmental impacts of Platinum Group Metal (PGM)</li> </ul>                         | <b>PGMs</b><br>5-10 years prior to the publication of this study<br>South Africa & Zimbabwe                                                      | <ul style="list-style-type: none"> <li>Mostly used sustainability reports</li> <li>Investigated sustainability indicators (GGEs, water discharge, energy and water use)</li> <li>Predicted GGEs based on Processed ore grade and technology used remaining constant</li> </ul>                                                                          | <ul style="list-style-type: none"> <li>Ore grade was declining although the reserves were found to be consistent</li> <li>GGEs increased per unit product over time and predicted to increase due to increasing depth and decreasing ore grades</li> <li>Water use efficiency was not influenced by scale, ore grade and time.</li> <li>Energy efficiency was invariable with time whilst ore grade had a subtle correlation.</li> </ul>                      |

| Study                                                                                                                                                                                                                                                 | Scope                                                                                                                                                                            | Methodology                                                                                                                                                                                                                                                                                                                                                                            | Conclusions                                                                                                                                                                                                                                                                                                                                                                                                                                                                                                                                                                           |
|-------------------------------------------------------------------------------------------------------------------------------------------------------------------------------------------------------------------------------------------------------|----------------------------------------------------------------------------------------------------------------------------------------------------------------------------------|----------------------------------------------------------------------------------------------------------------------------------------------------------------------------------------------------------------------------------------------------------------------------------------------------------------------------------------------------------------------------------------|---------------------------------------------------------------------------------------------------------------------------------------------------------------------------------------------------------------------------------------------------------------------------------------------------------------------------------------------------------------------------------------------------------------------------------------------------------------------------------------------------------------------------------------------------------------------------------------|
|                                                                                                                                                                                                                                                       |                                                                                                                                                                                  | <ul style="list-style-type: none"> <li>Ore grade and technology were assumed to remain constant with time.</li> </ul>                                                                                                                                                                                                                                                                  | <ul style="list-style-type: none"> <li>Decreasing production had decreased efficiency.</li> <li>Underground mines produced more waste rock than open cut mines.</li> </ul>                                                                                                                                                                                                                                                                                                                                                                                                            |
| <b>Northey, et al., 2013 [12]</b> <ul style="list-style-type: none"> <li>Assessed publicly available data from copper company financial and sustainability reports to determine environmental costs and suitability for use in LCA studies</li> </ul> | <b>Copper</b><br>Australia, Argentina, Canada, Chile, Finland, Laos, Papua New Guinea, Peru, Turkey, South Africa & USA<br>Copper companies' reports published from 1996 to 2010 | <ul style="list-style-type: none"> <li>Investigated the effect of processing routes and declining ore grade on water, energy and GGE intensity</li> <li>Data was sourced from company sustainability and financial reports</li> <li>Reports were analysed for consistency and whether they could be used for LCA studies</li> <li>Data gaps were calculated from other data</li> </ul> | <ul style="list-style-type: none"> <li>Ore grade was declining causing increase in energy intensity and GGEs but insignificant effect on water</li> <li>Grind size and smelting technology affected energy intensity. Underground mining required more energy</li> <li>Water intensity was higher with regions with high water scarcity</li> <li>Pyrometallurgical routes produced more GGEs than hydrometallurgical routes.</li> <li>Low quality and scarcity of water led to the increase in energy required to transport and treat the water leading to increased GGEs.</li> </ul> |
| <b>Calvo, et al., 2016 [8]</b> <ul style="list-style-type: none"> <li>Investigated energy consumption as a function of ore grade</li> </ul>                                                                                                           | <b>Gold, silver, copper, lead, zinc &amp; nickel</b><br>Up to 2014 with varying lower limits<br>16 multinational mining companies                                                | <ul style="list-style-type: none"> <li>Focused on energy consumption as function of ore grade over time</li> <li>Sustainability reports were main data source</li> <li>Comparison based on metal and production route</li> </ul>                                                                                                                                                       | <ul style="list-style-type: none"> <li>Ore grade was decreasing over time</li> <li>Resource use and waste generation was noted to increase with decrease in ore grade but there was no clear conclusion regarding specific resource use and ore grade</li> <li>Energy consumption per unit product metal increased over time due to decreasing ore grade (particularly with underground mining) due to ventilation and depth</li> </ul>                                                                                                                                               |
